# Supplementary material
Source: PubMed Central journal article supplement (PMC6118590)
Supplement: jci-128-97116-s113.pdf [file jci-128-97116-s113.pdf]

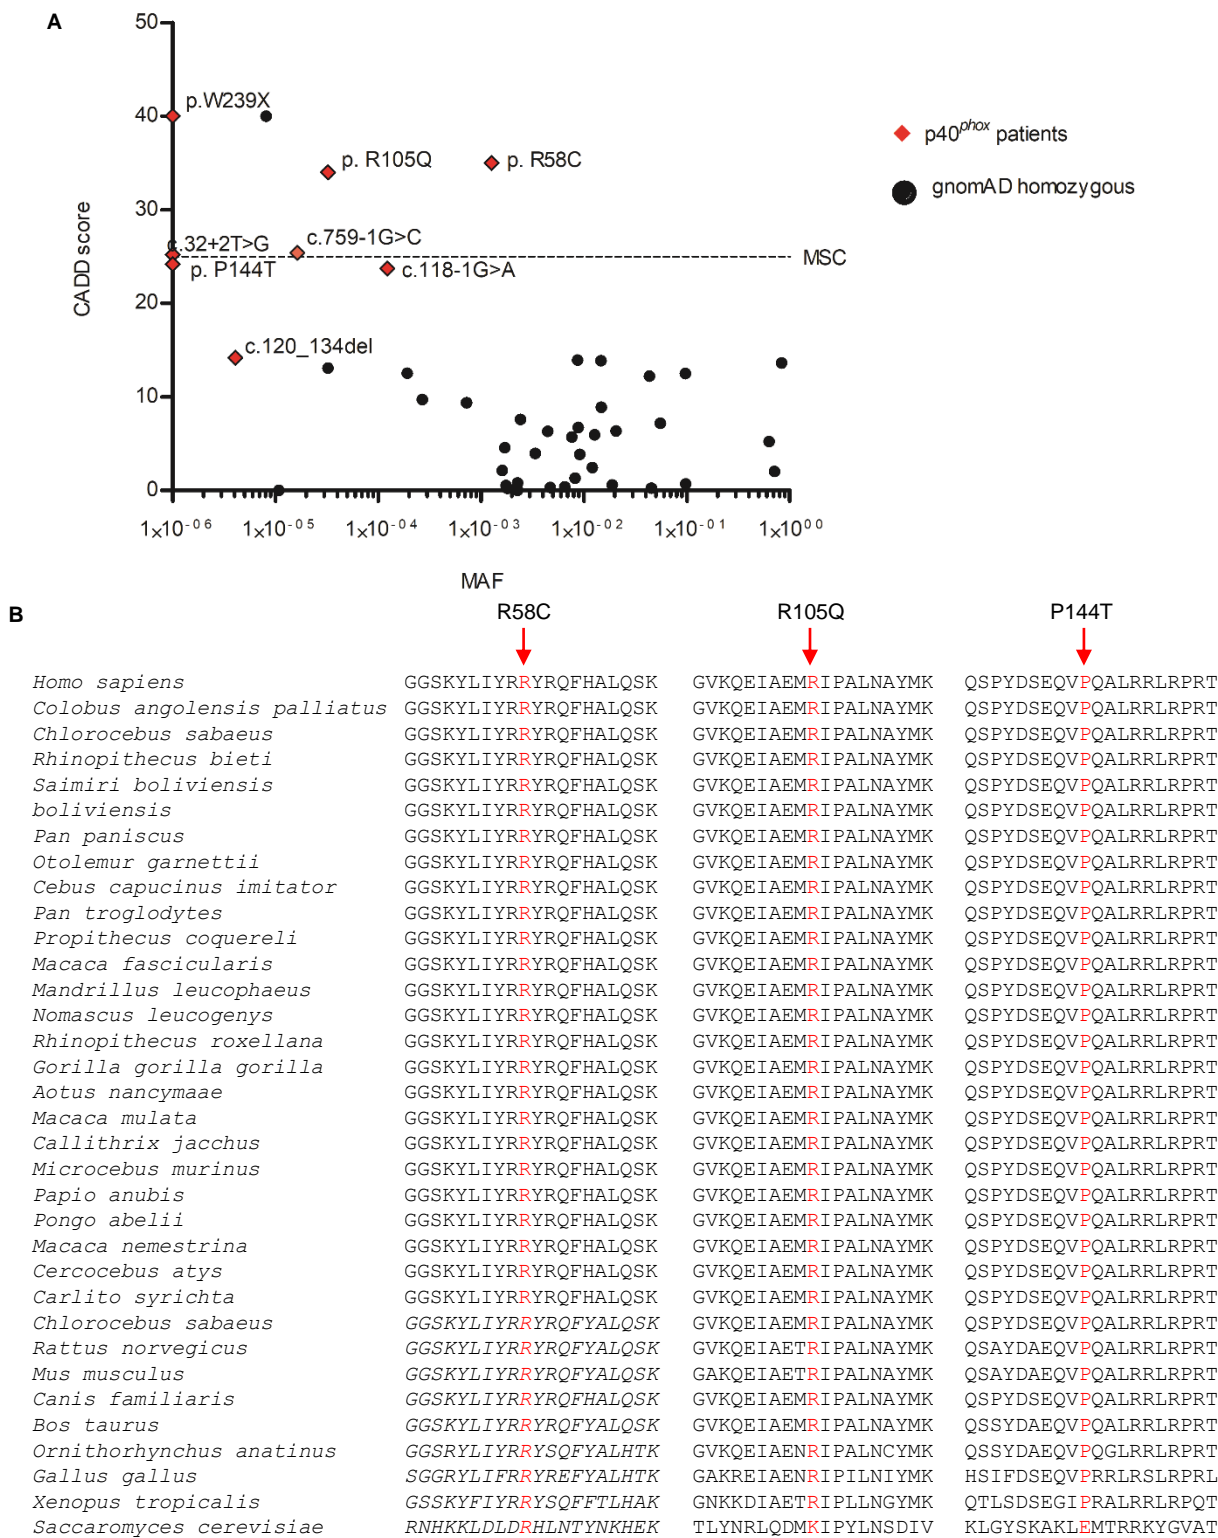

## Supplementary figure 1.

**Identification of *NCF4* mutations.** (A) All homozygous variants of *NCF4* present in gnomAD are plotted according to their CADD scores (y-axis) and minor allele frequency (MAF, x-axis). Red diamonds correspond to the mutations found in the 24 patients of this study. The dashed line indicates the mutation significance cutoff MSC. (B) Amino-acid residue conservation for the three missense mutations found in kindreds B, G, H and L.

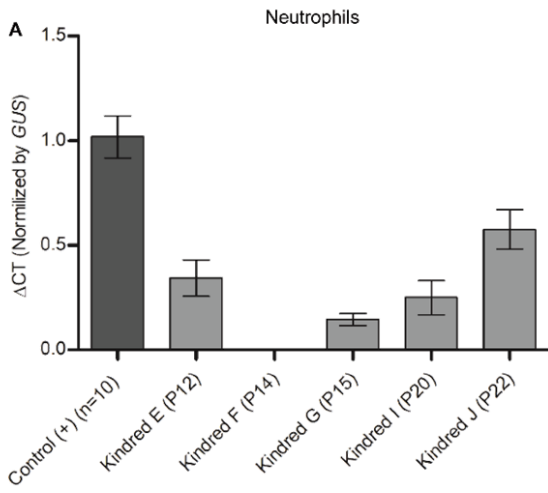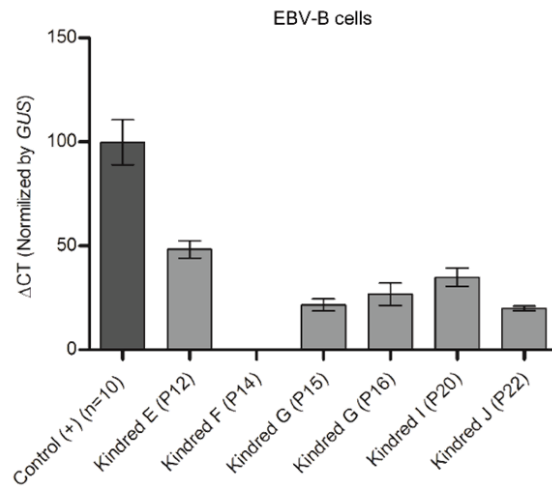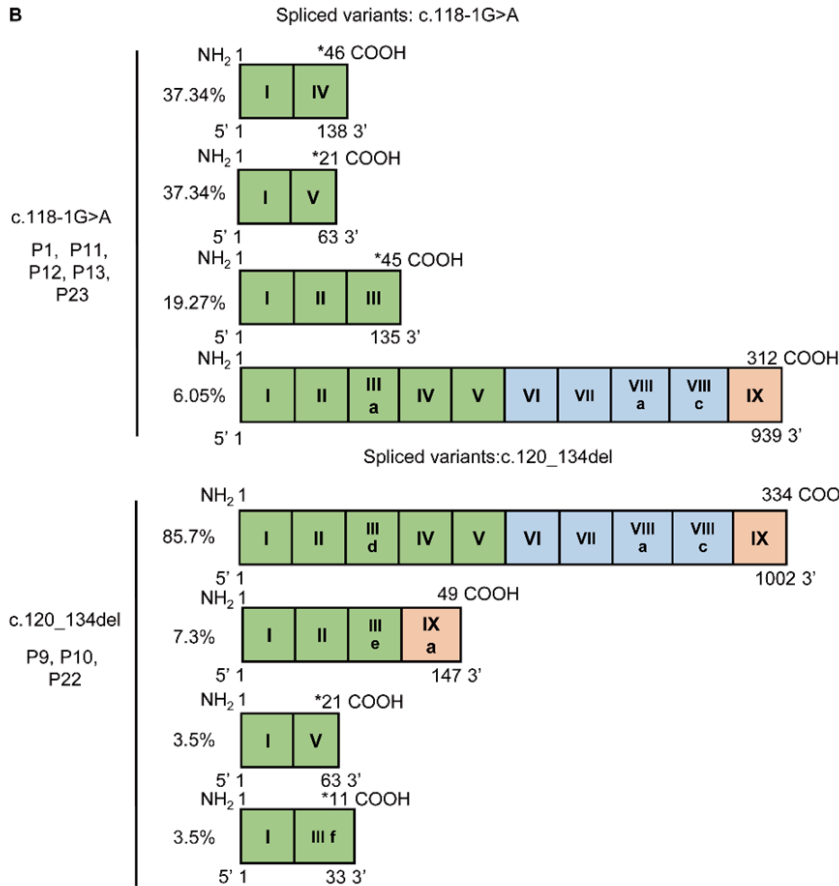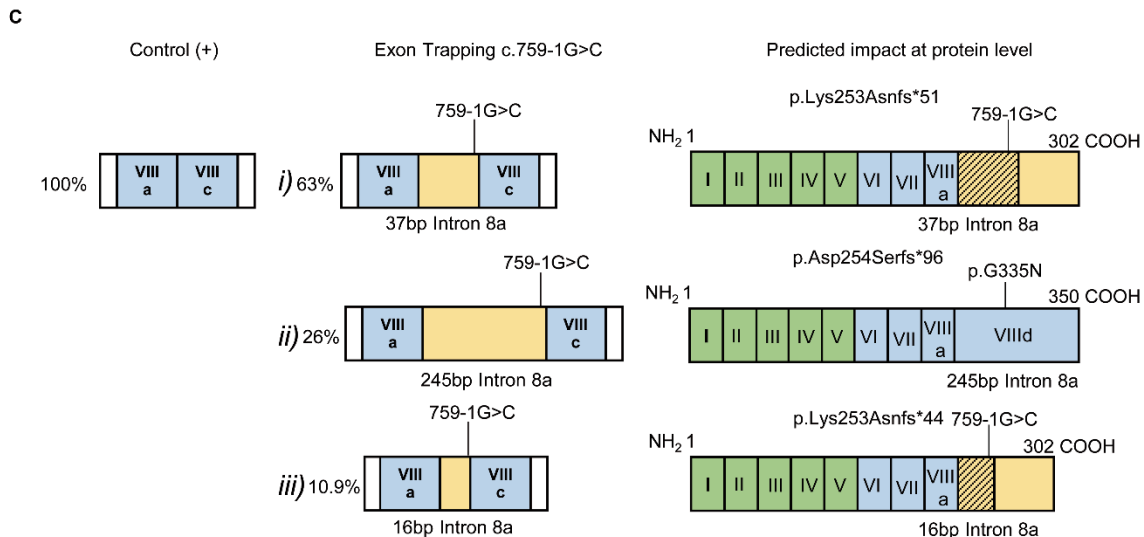

## Supplemental figure 2

**mRNA analysis of *NCF4* mutants.** (A) Quantitative PCR of the *NCF4* cDNA from EBV-B cells and neutrophils from patients carrying bi-allelic mutations of the *NCF4* gene. Data represent mean  $\pm$  SEM. (B) Schematic diagram and proportional expression of different splice variants in cells from homozygous carriers of the c.118-1G>A and c.120\_134del mutations. (C) Different spliced products and their frequency on overexpression of the WT sequence and of the sequence containing the c.759-1G>C mutation in an exon trapping experiment.

**A**

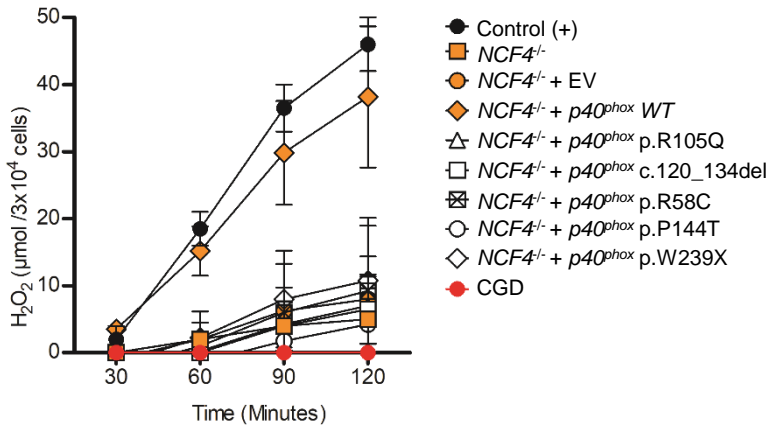

**B**

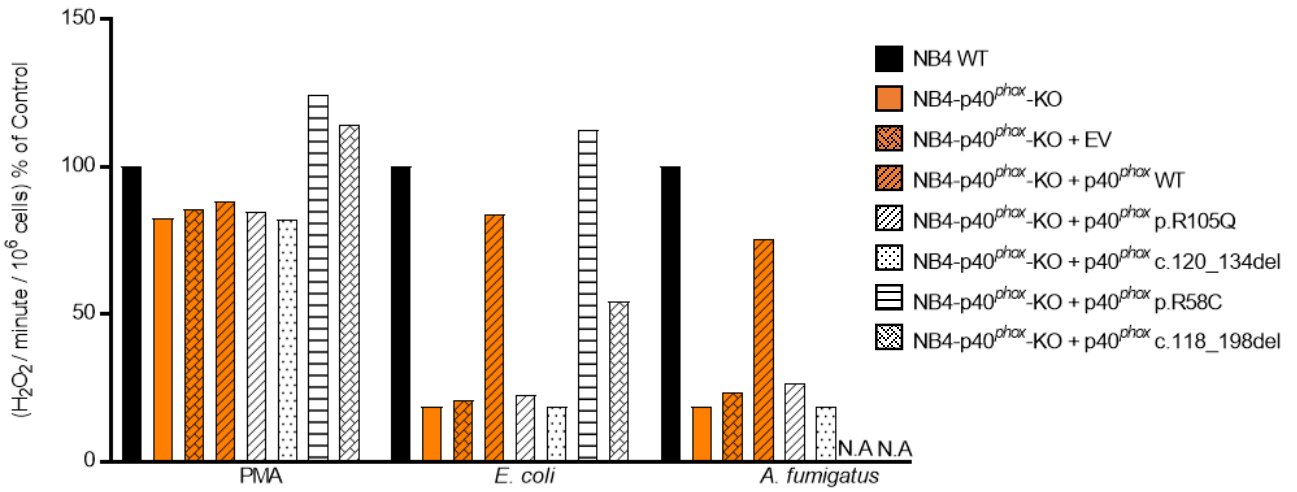

**Supplemental figure 3**

**H<sub>2</sub>O<sub>2</sub> release in transduced cells.** (A) Kinetic of EBV-B cells stimulated with PMA. Experiment representative of three replicates. Data represent mean ± SEM. (B) Extracellular H<sub>2</sub>O<sub>2</sub> generation by NB4 p40<sup>phox</sup> knockout (KO) cells lines upon stimulation with PMA, *E. coli* and *A. fumigatus*. N=2-3. 2-Tailed Mann U Whitney test. Data represent mean ± SEM.

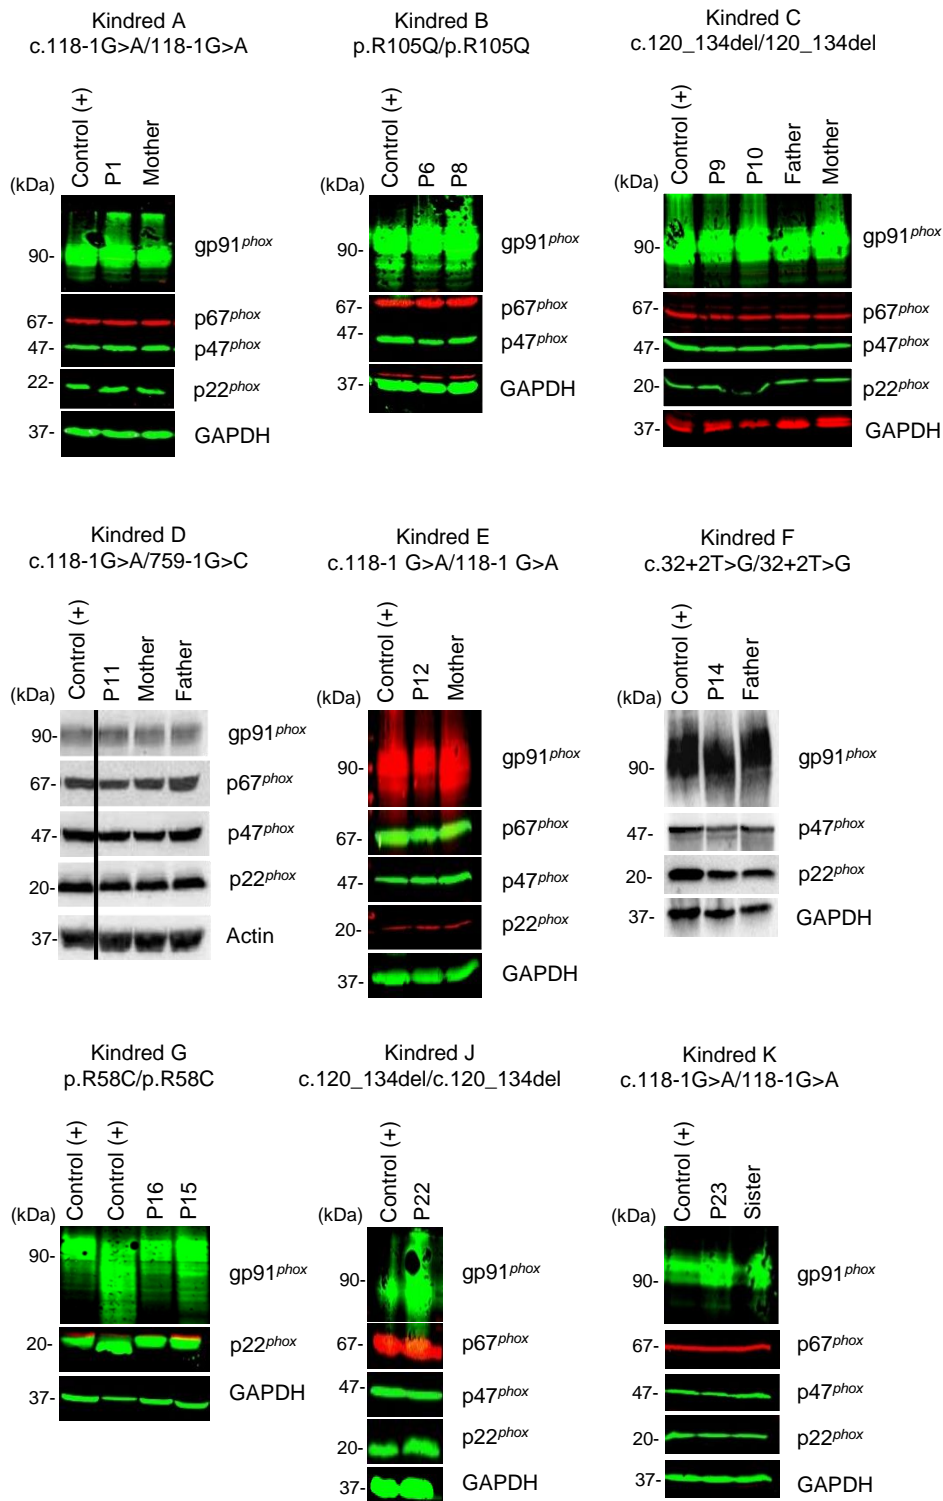

#### Supplemental figure 4

**NADPH oxidase component expression in p40<sup>phox</sup>-deficient neutrophils.** Western blot of total protein extracts from neutrophils of healthy controls, p40<sup>phox</sup>-deficient patients and heterozygous parents. Antibodies against gp91<sup>phox</sup>, p22<sup>phox</sup>, p67<sup>phox</sup> and p47<sup>phox</sup> were used. Actin or GAPDH protein was used as the loading control.

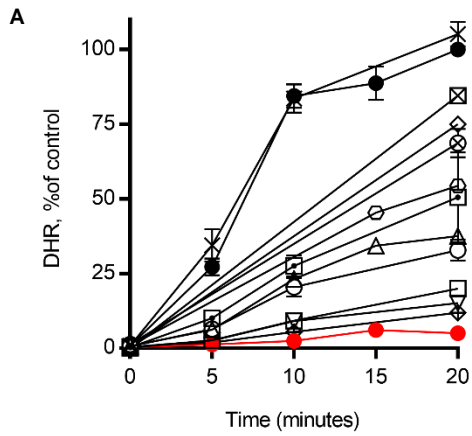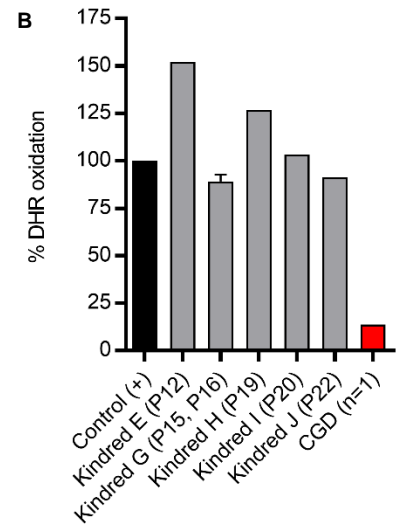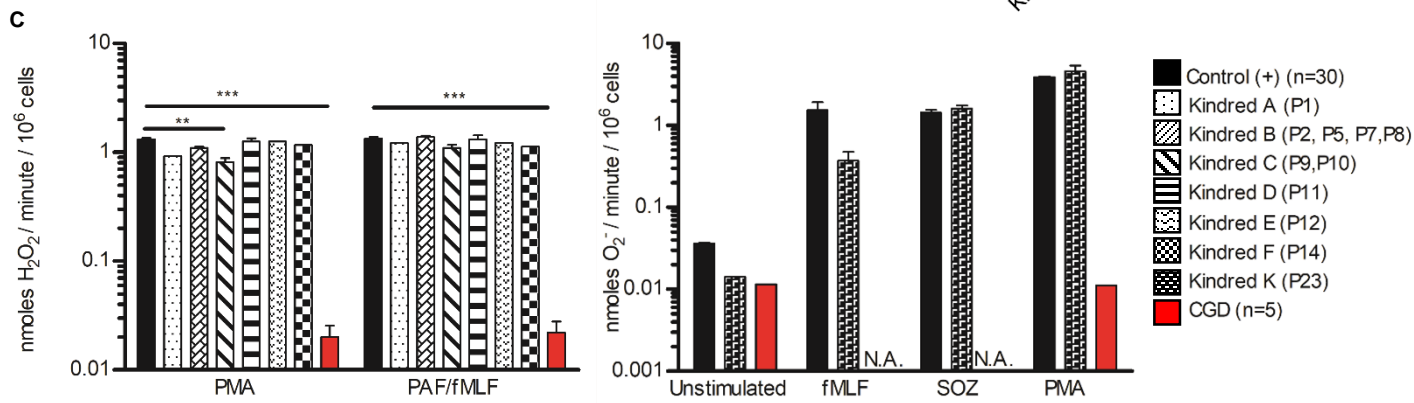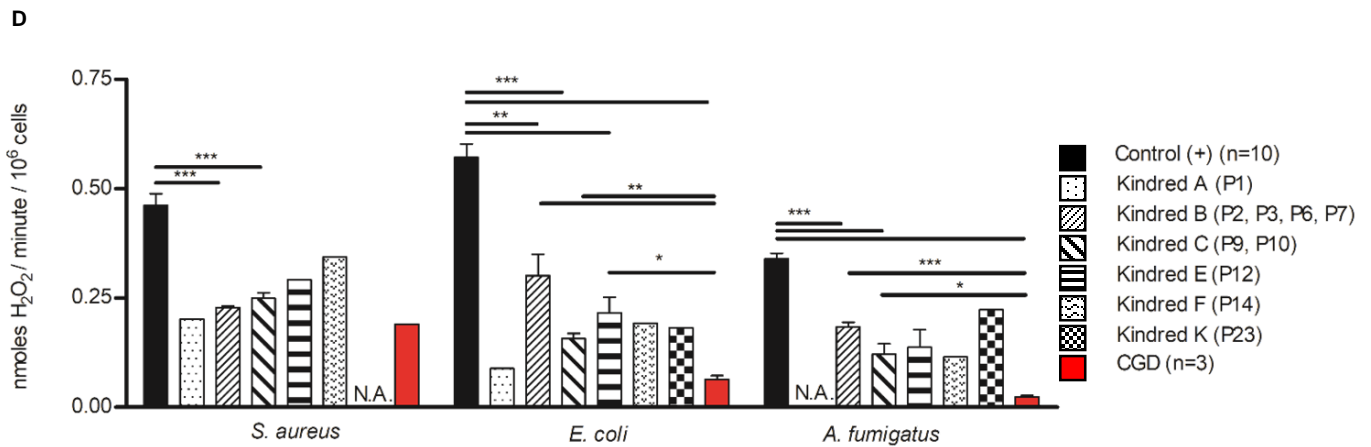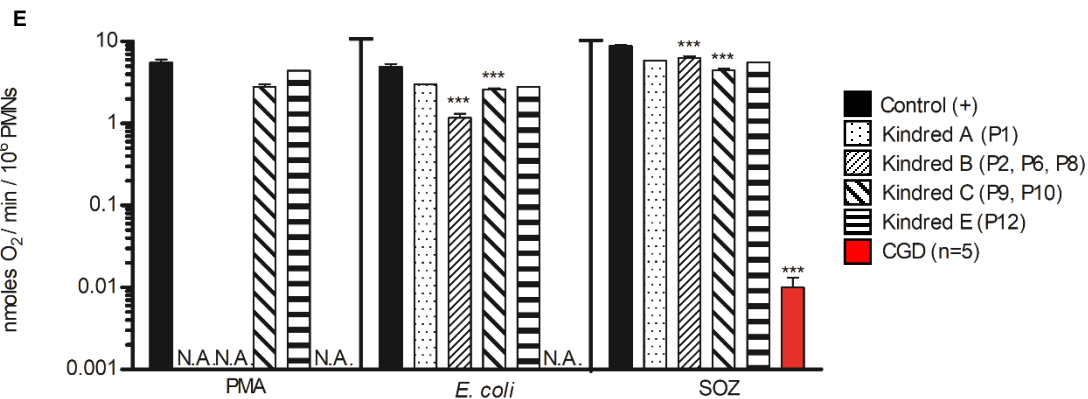

## Supplementary figure 5.

**NADPH oxidase activity in p40<sup>phox</sup>-deficient neutrophils and monocytes.** (A) Kinetic of DHR oxidation upon PMA stimulation in neutrophils from healthy controls ( $n=37$ ), p40<sup>phox</sup>-deficient patients and a CGD patient. (B) Intracellular ROS production by DHR oxidation in monocytes from healthy controls, p40<sup>phox</sup>-deficient patients and a CGD patient upon stimulation with PMA (400 ng/ $\mu$ L). (C) Extracellular H<sub>2</sub>O<sub>2</sub> detection (left) in neutrophils from healthy controls ( $n=30$ ), p40<sup>phox</sup>-deficient patients ( $n=10$ ) and CGD patients ( $n=5$ ) upon stimulation with PMA, or PAF/fMLF. Extracellular O<sub>2</sub><sup>-</sup> generation (right) by neutrophils from healthy controls ( $n=6$ ), P11 ( $n=3$ ) and a CGD patient ( $n=1$ ) upon stimulation with fMLF, SOZ or PMA. (D) Extracellular H<sub>2</sub>O<sub>2</sub> production by neutrophils from healthy controls ( $n=10$ ), p40<sup>phox</sup>-deficient patients ( $n=10$ ) and CGD patients ( $n=3$ ) upon stimulation with *E. coli*, *S. aureus* and *A. fumigatus*. N.A., not analyzed. (E) Oxygen consumption by neutrophils after stimulation with PMA, *E. coli* or SOZ. Healthy controls ( $n=3$ ) and p40<sup>phox</sup>-deficient patients ( $n=7$ ) were tested with PMA; healthy controls ( $n=8$ ) and p40<sup>phox</sup>-deficient patients ( $n=13$ ) were tested with *E. coli*; and healthy controls ( $n=13$ ), p40<sup>phox</sup>-deficient patients ( $n=11$ ) and CGD patients ( $n=5$ ) were tested with SOZ. Data represent mean  $\pm$  SEM when  $N>3$ . N.A., not analyzed. \* $p<0.05$ , \*\* $p<0.01$  and \*\*\* $p<0.001$ . For figures (C) and (E) the Bonferroni correction for multiple comparisons was applied and an adjusted p value of 0.0083 (*S. aureus* and *A. fumigatus*) or 0.0071 (*E. coli*, PMA, PAF/fMLF) was considered significant (\*).

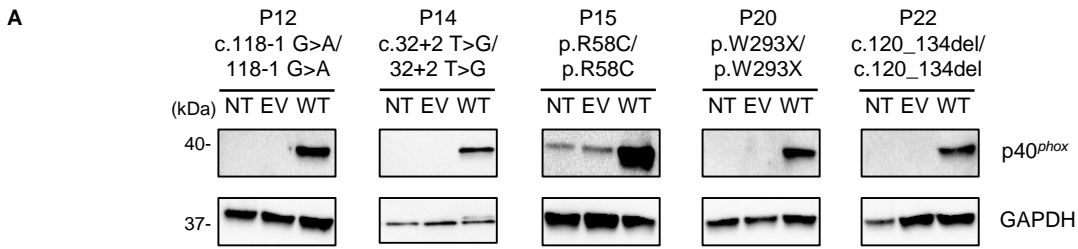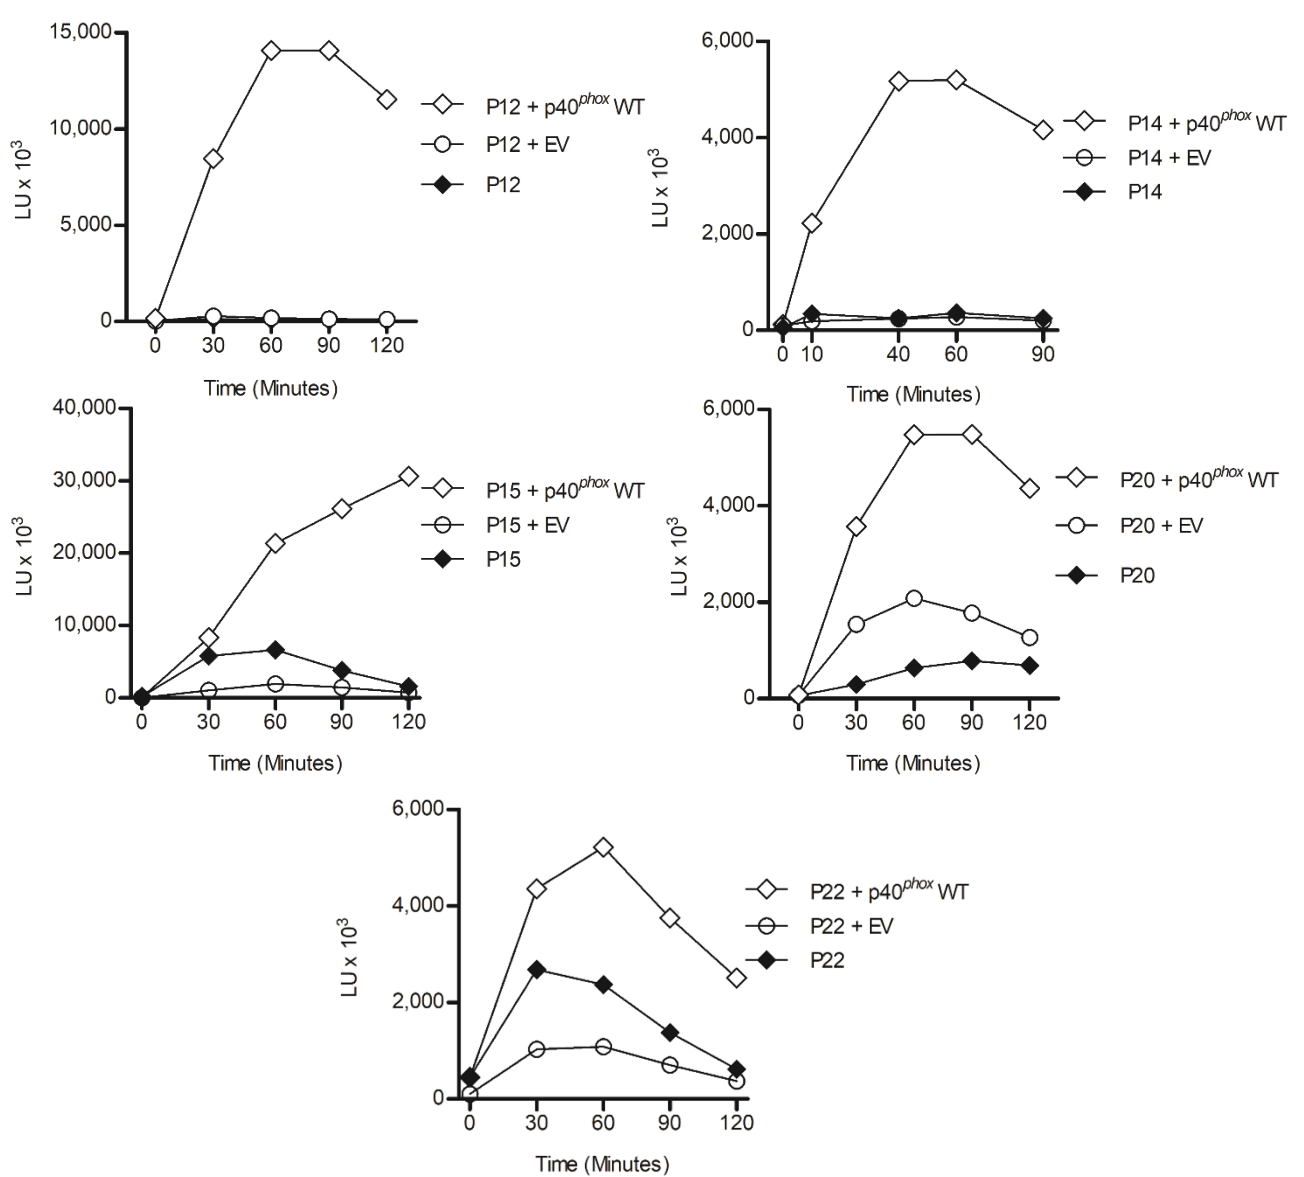

**Supplementary figure 6.**

**Reconstitution of p40<sup>phox</sup> in EBV-B cells from patients.** (A) p40<sup>phox</sup> protein expression of EBV-B cells transduced with an empty vector (EV) or a vector encoding the WT p40<sup>phox</sup> protein, and non-transduced cells, from P12, P14, P15 and P22. (B) Production of O<sub>2</sub><sup>-</sup> upon PMA stimulation in p40<sup>phox</sup> deficient EBV-B cells transduced with EV or a vector encoding WT p40<sup>phox</sup> protein and non-transduced cells, from P12, P14, P15 and P22.



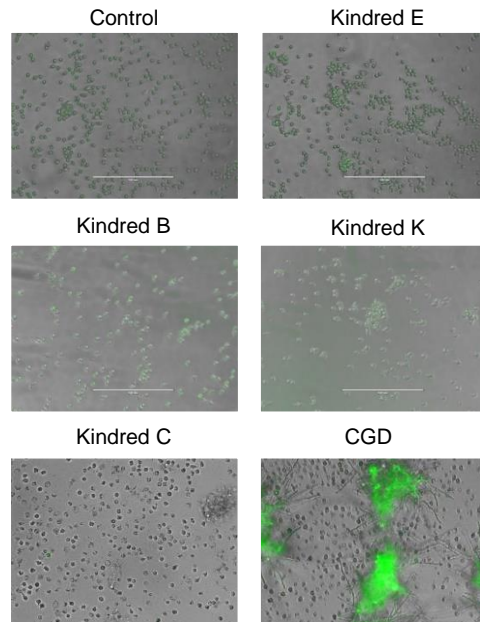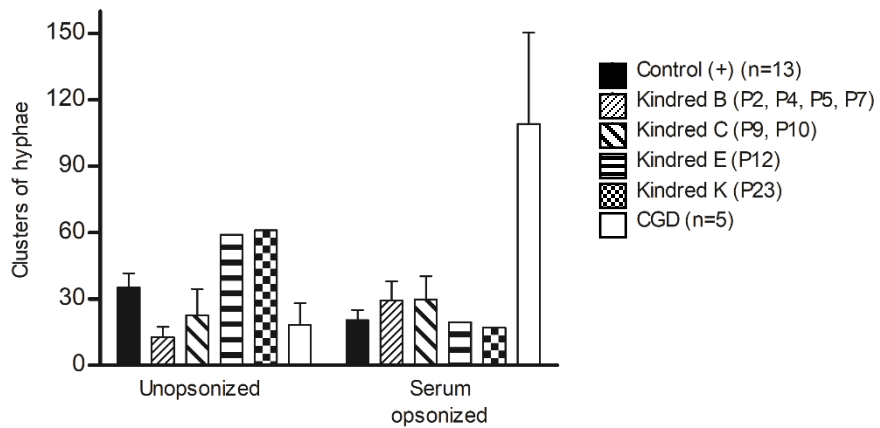

**Supplementary figure 7.**

**Inhibition of *C. albicans* germination by neutrophils.** Cocultures of *C. albicans* and neutrophils from healthy controls ( $n=13$ ),  $p40^{phox}$ -deficient patients ( $n=8$ ) and CGD patients ( $n=5$ ). Inhibition of hypha formation was evaluated by microscopy. Upper panel: representative micrographs of incubations. Bottom panel: Quantification of hypha formation. Two-tailed Mann U Whitney test. Data represent mean + SEM when  $N \geq 3$  or mean only when  $N < 3$ . The Bonferroni correction for multiple comparisons was applied and an adjusted p value of 0.01 considered significant (\*) and \*\*\*  $p < 0.001$ .

A

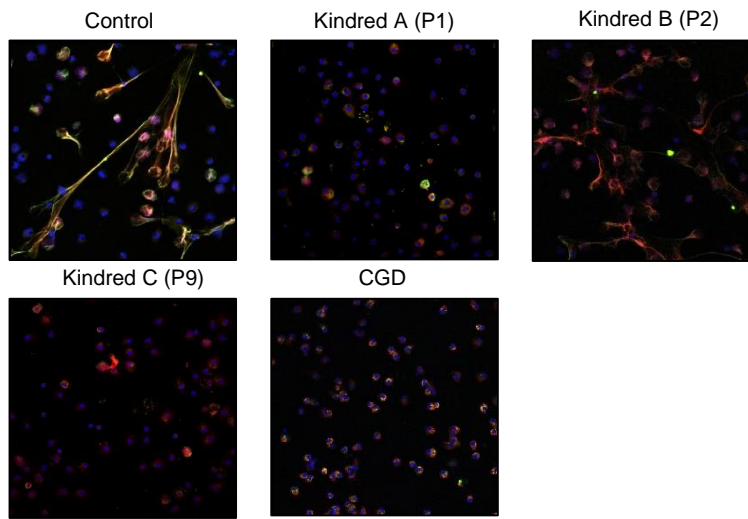

B

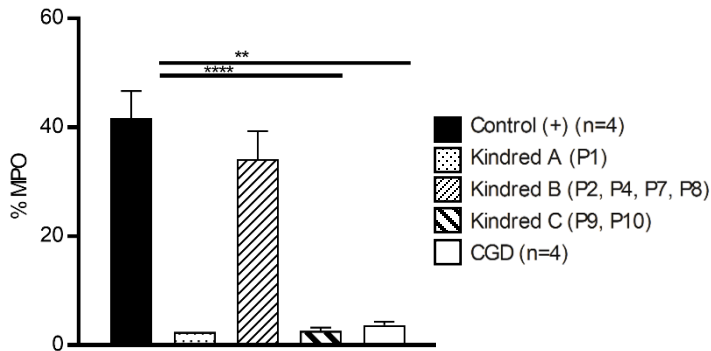

C

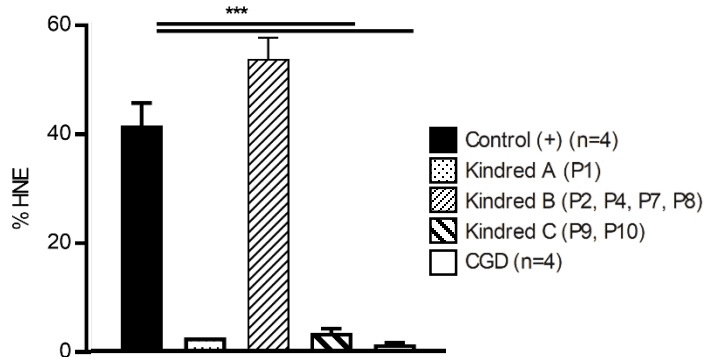

### Supplementary figure 8.

**Extracellular trap formation by neutrophils.** (A) NET formation induced with PMA in neutrophils. The pictures are representative from healthy controls ( $n=4$ ),  $p40^{phox}$ -deficient patients ( $n=7$ ) and CGD patients ( $n=4$ ). Original pictures after NET induction and staining for myeloperoxidase - MPO (red), human neutrophil elastase - HNE (green) and DNA (blue). NET quantification was performed as described in the Supplementary Methods. Relative MPO (B) and HNE (C) positive areas were measured by fluorescence microscopy. 4 Dots represent 4 fields analyzed during a single experiment. 2-Tailed Mann U Whitney test. Data represent mean + SEM when  $N \geq 3$  or mean only when  $N < 3$ . The Bonferroni correction for multiple comparisons was applied and an adjusted p value of 0.0125 was considered significant (\*). \*\*\*  $p < 0.001$ .

**Supplementary Table 1. Comparison of clinical manifestations between patients with p40<sup>phox</sup> deficiency and CGD cohorts**

|                           | <b>USA cohort</b><br>(ref. 7)                   | <b>European cohort</b><br>(ref. 9)                                   | <b>Latin American cohort</b><br>(ref. 8) | <b>p40<sup>phox</sup> deficiency study cohort</b>  |                                                          |
|---------------------------|-------------------------------------------------|----------------------------------------------------------------------|------------------------------------------|----------------------------------------------------|----------------------------------------------------------|
| Frequency                 | % of patients<br>≥ 1 episode                    | % of patients<br>≥ 1 episode                                         | % of patients<br>≥ 1 episode             | % of patients<br>≥ 1 episode<br>Total <i>n</i> =24 | % of patients<br>≥ 1 episode<br>Symptomatic <i>n</i> =20 |
| <b>Infections</b>         |                                                 |                                                                      |                                          |                                                    |                                                          |
| Lung                      | 79%                                             | 66%<br>(infection/inflammation<br>not specified)                     | 78%                                      | 13%                                                | 15%                                                      |
| Skin                      | 5% cellulitis; 42%<br>subcutaneous<br>abscesses | 17% abscesses;<br>17% dermatitis,<br>5% furunculosis,<br>6% BCG-itis | 43%                                      | 42%                                                | 50%                                                      |
| Lymph node                | 53%                                             | 50%                                                                  | 60%                                      | 17%                                                | 20%                                                      |
| Liver                     | 27% (hepatic<br>abscesses)                      | 32%                                                                  | Not reported/specified                   | Absent                                             | Absent                                                   |
| Urinary tract             | Not reported                                    | 22%                                                                  | 22.5%                                    | Absent                                             | Absent                                                   |
| Bacteremia/<br>septicemia | 18%                                             | 20%                                                                  | 25%                                      | Absent                                             | Absent                                                   |
| Widespread infection      | Not reported/specified                          | Not reported/specified                                               | Not reported/specified                   | 4%<br>(histoplasmosis)                             | 5%<br>(histoplasmosis)                                   |
| Ear                       | Not reported                                    | 14%                                                                  | 30%                                      | Absent                                             | Absent                                                   |
| Bone                      | 25%                                             | 13%                                                                  | 18%                                      | Absent                                             | Absent                                                   |
| Eye                       | Not reported/specified                          | 11%                                                                  | Not reported/specified                   | Absent                                             | Absent                                                   |
| Brain                     | 4% meningitis; 3%<br>brain abscesses            | 7%                                                                   | Not reported/specified                   | 4%                                                 | 5%                                                       |

**Autoimmunity/Hyper-inflammation**

|                      |                        |                                                          |                        |     |       |
|----------------------|------------------------|----------------------------------------------------------|------------------------|-----|-------|
| Lung                 | 16%                    | Not reported/specified                                   | Not reported/specified | 9%  | 11%   |
| Skin                 | 10%                    | 2%                                                       | Not reported/specified | 42% | 50%   |
| GI - oral            | Not reported/specified | 11% aphthae,<br>11% stomatitis,<br>11% gingivitis/caries | Not reported/specified | 30% | 37%   |
| GI – (entero)colitis | 17%                    | 9%                                                       | Not reported/specified | 25% | 30%   |
| GI – peri-anal       | Not reported/specified | 21%                                                      | Not reported/specified | 17% | 20%   |
| Other                | 17%                    | Not reported/specified                                   |                        | 13% | 15.8% |

GI: gastrointestinal

**Supplementary Table 2. Comparison of genetic and genotypic characteristics in p40<sup>phox</sup> deficiency and CGD (several different cohorts)**

| Characteristic                                  | USA cohort<br>(ref. 7) |              | European cohort<br>(ref. 9) |              | Turkish cohort<br>(ref. 19) |                                                                                              | Latin American cohort<br>(ref. 8) |                  | Israeli cohort<br>(ref. 18) |                                                                                             | p40 <sup>phox</sup><br>deficient<br>study cohort     |
|-------------------------------------------------|------------------------|--------------|-----------------------------|--------------|-----------------------------|----------------------------------------------------------------------------------------------|-----------------------------------|------------------|-----------------------------|---------------------------------------------------------------------------------------------|------------------------------------------------------|
|                                                 | XR =                   | AR =         | XR =                        | AR =         | XR =                        | AR =                                                                                         | XR =                              | AR =             | XR =                        | AR =                                                                                        |                                                      |
| <b>Genetic type;<br/>frequency</b>              | 259*                   | 81*          | 279**                       | 136**        | 34 <sup>^</sup>             | 50 <sup>^</sup>                                                                              | 53                                | 18 <sup>^^</sup> | 32                          | 52                                                                                          | p40 <sup>phox</sup> N= 24                            |
| <b>Age at disease onset<br/>(years)</b>         | Not reported           | Not reported | Not reported                | Not reported | Not reported                | Not reported                                                                                 | 1.8 (0-13)                        | 2.8 (0-7)        | 0.9 (0-4)                   | 3.5 (0-4)                                                                                   | 6 (1-17)                                             |
| <b>Age at diagnosis<br/>(years)</b>             | 3.0                    | 7.8          | 4.9                         | 8.8          | 2.7 (0-8)                   | 5.2 (0-18)                                                                                   | 3.6 (0-17)                        | 8.2 (0-14)       | 3.2 (0-8)                   | 7.0 (0-40)                                                                                  | 13.9 (1-46)                                          |
| <b>Mortality</b>                                | 21%                    | 9%           | 23%                         | 15%          | 9%                          | 12%                                                                                          | Not reported                      | Not reported     | 22%                         | 17%                                                                                         | 0%                                                   |
| <b>NADPH oxidase<br/>activity (neutrophils)</b> | Not reported           | Not reported | Not reported                | Not reported | DHR                         | DHR                                                                                          | Not reported                      | Not reported     | DHR                         | DHR                                                                                         | DHR (PMA)                                            |
| <b>Absent</b>                                   | Not reported           | Not reported | Not reported                | Not reported | 100%                        | 0%                                                                                           | Not reported                      | Not reported     | 90%                         | 0%                                                                                          | 0%                                                   |
| <b>Residual</b>                                 | Not reported           | Not reported | Not reported                | Not reported | <2% of control              | p47 <sup>phox</sup> 8.5%<br>p22 <sup>phox</sup> <2%<br>p67 <sup>phox</sup> <2%<br>of control | Not reported                      | Not reported     | 10% with 41% normal values  | p47 <sup>phox</sup> 5.4%<br>p22 <sup>phox</sup> 10%<br>p67 <sup>phox</sup> 4%<br>of control | 100% with 50-90% of control values (400ng/mL of PMA) |

\* N=28 unknown \*\* N=37 unknown <sup>^</sup>N=5 unknown <sup>^^</sup>including 16 with p47<sup>phox</sup> deficiency

**Supplementary Table 3. Primer sequences and conditions for genomic amplification of *NCF4* gene.**

| Primer sequence                  | Conditions                                                                                                                                                                                                                                                                                                                                                                                                                                                  |
|----------------------------------|-------------------------------------------------------------------------------------------------------------------------------------------------------------------------------------------------------------------------------------------------------------------------------------------------------------------------------------------------------------------------------------------------------------------------------------------------------------|
| Exon 1                           | We used Rapid Cyclor technology (BioFire Diagnostics, USA) with 50 cycles of 5 s at 95°C, 30 s at 65°C and 60 s at 72°C, in 15 µl of PCR buffer containing 2 IU of Taq polymerase (Promega Benelux, The Netherlands), 2 U TaqStart antibody (Takara, USA), 50 ng of each primer, 200 µM for each of the dNTPs, 50 mM KCl, 1.5 mM MgCl <sub>2</sub> , 0.1% (v/v) Triton X-100, 10 mM Tris, pH 9.0 at 25°C, in 10-µl glass capillaries (BioFire Diagnostics). |
| 5'-TGAGGCTTGGCGCCAAGGACTGACA-3'  |                                                                                                                                                                                                                                                                                                                                                                                                                                                             |
| 5'-CCCTAAGGCCCTATGAGGAGCAGTG-3'  |                                                                                                                                                                                                                                                                                                                                                                                                                                                             |
| Exon 3                           |                                                                                                                                                                                                                                                                                                                                                                                                                                                             |
| 5'-ACCTCTTTTGGCTTGTGCTCCTGG-3'   |                                                                                                                                                                                                                                                                                                                                                                                                                                                             |
| 5'-GGGGGCCCTGGAAGGAAGGAGAGTCA-3' |                                                                                                                                                                                                                                                                                                                                                                                                                                                             |
| Exon 4                           |                                                                                                                                                                                                                                                                                                                                                                                                                                                             |
| 5'-TCTGGCCAGGGTTCCTGGCCTGTAG-3'  |                                                                                                                                                                                                                                                                                                                                                                                                                                                             |
| 5'-GTACGTGGGCTCCCCACCAATACT-3'   |                                                                                                                                                                                                                                                                                                                                                                                                                                                             |
| Exon 2                           |                                                                                                                                                                                                                                                                                                                                                                                                                                                             |
| 5'-GCACTCTACCTCATACCCGG-3'       | 2.5mM of magnesium and 10% of DMSO TM= 59°C                                                                                                                                                                                                                                                                                                                                                                                                                 |
| 5'-TCAGAGGGCAAGGTTTCAGAG-3'      |                                                                                                                                                                                                                                                                                                                                                                                                                                                             |
| Exon 6                           | 2.5mM of magnesium and 10% of DMSO TM= 59°C                                                                                                                                                                                                                                                                                                                                                                                                                 |
| 5'-CCCCTCTTCTCTCTCCACAG-3'       |                                                                                                                                                                                                                                                                                                                                                                                                                                                             |
| 5'-GCTGTAACCCCTTCCTTCCT-3'       | 2.5mM of magnesium and 10% of DMSO TM= 59°C                                                                                                                                                                                                                                                                                                                                                                                                                 |
| Exon 7                           |                                                                                                                                                                                                                                                                                                                                                                                                                                                             |
| 5'-TACTGCACGCTTCTCCTCA-3'        | 2.5mM of magnesium and 10% of DMSO TM= 59°C                                                                                                                                                                                                                                                                                                                                                                                                                 |
| 5'-TTCCCTCCAACCTCACCTTC-3'       |                                                                                                                                                                                                                                                                                                                                                                                                                                                             |
| Exon 8                           | 2.5mM of magnesium and 10% of DMSO TM= 61°C                                                                                                                                                                                                                                                                                                                                                                                                                 |
| 5'-TCCCTTCTCTTCCTCTGCAG-3'       |                                                                                                                                                                                                                                                                                                                                                                                                                                                             |
| 5'-GTATCTAACTCCCCAGCCCC-3'       |                                                                                                                                                                                                                                                                                                                                                                                                                                                             |

**Supplementary Table 4. Reference and clones of antibodies.**

| Antibody                                                                                                            | Source                                 | Catalogue Number                       | Clone Number                         |
|---------------------------------------------------------------------------------------------------------------------|----------------------------------------|----------------------------------------|--------------------------------------|
| anti-gp91 <sup>phox</sup>                                                                                           | Sanquin Reagents,<br>Netherlands       | MW1842                                 | 48                                   |
| anti-gp91 <sup>phox</sup> (Intracellular<br>Stainig)                                                                | Santa Cruz Biotechnology,<br>USA       | sc-130543                              | 54.1                                 |
| anti-p22 <sup>phox</sup>                                                                                            | Sanquin Reagents,<br>Netherlands       | MW1843                                 | 449                                  |
| anti-p22 <sup>phox</sup> (Intracellular<br>Stainig)                                                                 | Santa Cruz Biotechnology,<br>USA       | sc-130550                              | 44.1                                 |
| anti-p47 <sup>phox</sup>                                                                                            | Santa Cruz Biotechnology,<br>USA       | sc-17845                               | D-10                                 |
| anti-p47 <sup>phox</sup>                                                                                            | Merck Millipore, USA                   | 07-001                                 | Rabbit antiserum. LOT:<br>DAM1413939 |
| anti-p47 <sup>phox</sup> (Intracellular<br>Stainig)                                                                 | Santa Cruz Biotechnology,<br>USA       | sc-17845                               | D-10                                 |
| anti-p67 <sup>phox</sup>                                                                                            | Merck Millipore, USA                   | 07-002                                 | polyclonal                           |
| anti-p67 <sup>phox</sup> (Intracellular<br>Stainig)                                                                 | Santa Cruz Biotechnology,<br>USA       | sc-374510                              | D-6                                  |
| anti-p40 <sup>phox</sup>                                                                                            | Abcam, UK                              | ab76158                                | EP2142Y                              |
| anti-p40 <sup>phox</sup>                                                                                            | Merck Millipore, USA                   | 07-503                                 | Rabbit polyclonal. LOT:<br>2876659   |
| Anti-GAPDH                                                                                                          | Merck Millipore, USA                   | MAB374                                 | 6C5                                  |
| The anti-p22 <sup>phox</sup> , anti-p47 <sup>phox</sup> ,<br>anti-p67 <sup>phox</sup> and anti-gp91 <sup>phox</sup> | Produced by dr. Thomas L.<br>Leto, NIH | Produced by Dr. Thomas L. Leto,<br>NIH | polyclonal                           |
| anti-actin                                                                                                          | Merck Millipore, USA                   | MAB1501                                | C4                                   |
| Secondary antibodies                                                                                                |                                        |                                        |                                      |

|                                              |                         |           |            |
|----------------------------------------------|-------------------------|-----------|------------|
| Donkey-antigoat-IgG IRDye<br>800CW           | LI-COR Biosciences, USA | 629-68023 | polyclonal |
| goat anti-mouse-IgG IRDye<br>800CW           | LI-COR Biosciences, USA | 926-68070 | polyclonal |
| goat anti-rabbit-IgG IRDye<br>680CW          | Life technologies, USA  | A11070    | polyclonal |
| Goat anti-rabbit IgG (H+L)-<br>HRP conjugate | Bio-rad, USA            | 170-6515  | polyclonal |
| Goat anti-mouse IgG (H+L)-<br>HRP conjugate  | Bio-rad, USA            | 170-6516  | polyclonal |



## Supplementary Methods

### Neutrophil purification

Neutrophils were purified by centrifuging blood on a Percoll gradient with a density of 1.074 g/ml (purity >95%). The erythrocytes in the pellet were lysed with isotonic  $\text{NH}_4\text{Cl-KHCO}_3\text{-EDTA}$  solution (1). Cells were resuspended in HEPES<sup>+</sup> incubation medium.

### Phagocytosis

Zymosan (10 mg/ml, Sigma-Aldrich, St. Louis, MO, USA), *E. coli* (OD<sub>600</sub> 1.0, strain ML-35) and *S. aureus* (OD<sub>600</sub> 1.0, strain Oxford) were incubated with 1  $\mu\text{g}$  of FITC (Sigma-Aldrich) for 30 minutes at 37°C, resuspended in PBS and opsonized with 10% (v/v) serum for 10 minutes at 37°C at 550 rpm (Eppendorf Thermomixer C, Eppendorf AD, Hamburg, Germany). The opsonized zymosan was added to  $0.5 \times 10^6$  neutrophils and 125  $\mu\text{l}$  of HEPES<sup>+</sup>. Samples were removed at various time points and mixed with STOP-buffer (20 mM NaF, 0.5 % [w/v] PFA, 1% [v/v] BSA in PBS) in a 96-well Maxisorp plate, on ice (Thermo Fisher, Roskilde, Denmark). Phagocytosis was analyzed by assessing the percent FITC-positive cells and the mean MFI, by flow cytometry (FACSCANTO II/LSR).

### Degranulation

Protease release after degranulation was measured by assessing the degradation of fluorescent DQ-green BSA (bovine serum albumin) (Life Technologies), as previously described (2). In short, neutrophils ( $2 \times 10^6/\text{ml}$ ) were incubated with DQ-BSA (1:90) and PAF (1  $\mu\text{M}$ ) or cytochalasin B (5  $\mu\text{g}/\text{ml}$ ) for 5 min at 37°C. The cells were then stimulated with 1  $\mu\text{M}$  fMLF or 100 ng/ml PMA (all stimuli were purchased from Sigma-Aldrich, St. Louis, MO, USA). An

unstimulated control value and a 100% content value with Triton X-100 (1% w/v) were also determined. Degranulation was assessed with the Infinite F200-pro plate reader (Tecan).

### **Bacterial and fungal killing**

The killing of bacteria by neutrophils was determined as previously described (3). Briefly, *S. aureus* and *E. coli* were grown aerobically at 37°C in Luria Bertani (LB) broth for 3 hours. Pathogen density was then adjusted to an OD<sub>600</sub> of 1.0 in PBS and the pathogens were opsonized with 10% (v/v) pooled human serum at 37°C for 15 minutes before incubation with 2x10<sup>6</sup> neutrophils at a bacterium/neutrophil ratio of 5:1. At various time points, 50-µl samples were added to 2.5 ml of H<sub>2</sub>O/NaOH pH 11, and the samples were then spread onto LB agar plates for overnight incubation. CFUs were counted the following day. For *S. aureus* killing by NB4 cells, 10x10<sup>6</sup> cells/ml were initially incubated overnight with IFN-γ (1:4000) and G-CSF (1:2000, both from PeproTech, Rocky Hill) . The cells were then used with a yeast/neutrophil ratio of 10:1.

*C. albicans* conidia were grown at 30°C, and used at an OD<sub>625</sub> of 0.2. The inhibition of *C. albicans* germination and hyphenation was analyzed as previously described (4). In brief, GFP-*C. albicans* conidia were incubated with neutrophils overnight at 37°C, under an atmosphere containing 5% CO<sub>2</sub>. The next day, clusters of *Candida* hyphae were counted under a digital fluorescence microscope (Evos, Belgium). Both *Candida* killing assays were performed with serum-opsonized and non-opsonized yeasts at a yeast/neutrophil ratio of 4:1. The killing of *A. fumigatus* hyphae was assessed as previously described (5).

### **Western blotting of phagocyte proteins**

The presence of the various phagocyte NADPH oxidase proteins was analyzed by western blotting. Reference number and clones are listed in Supplementary Table 4. In neutrophils from kindreds A, B, C, E, G, J and K monoclonal antibodies anti-gp91<sup>phox</sup> and anti-p22<sup>phox</sup> were used. Monoclonal anti-p47<sup>phox</sup>, polyclonal anti-p67<sup>phox</sup> and monoclonal anti-p40<sup>phox</sup> antibodies were used. Anti-GAPDH antibodies was used for detection of the loading control. For analyses of protein content in kindred D, a monoclonal rabbit anti-p40<sup>phox</sup> antibody was used. The anti-p22<sup>phox</sup>, anti-p47<sup>phox</sup>, anti-p67<sup>phox</sup> and anti-gp91<sup>phox</sup> antibodies were provided by Dr. Tom Leto, NIAID, NIH. Actin was used as a loading control. For p40<sup>phox</sup> expression in neutrophils from the patients of kindreds F, G and I and in monocyte-derived macrophages from patients of kindreds E, I and J, polyclonal anti-p40<sup>phox</sup> antibodies were used. Anti-GAPDH antibody was used for detection of the loading control. The secondary antibodies used were donkey-anti-goat-IgG IRDye 800CW, goat anti-mouse-IgG IRDye 800CW or goat anti-rabbit-IgG IRDye 680CW Antibody binding was quantified on an Odyssey Infrared Imaging system (LI-COR Biosciences, USA).

### **Extracellular O<sub>2</sub><sup>-</sup>: cytochrome *c* reduction**

Extracellular O<sub>2</sub><sup>-</sup> production was assayed by evaluating cytochrome-*c* reduction. Neutrophils (1x10<sup>6</sup>/ml) were incubated at 37°C with ferri-cytochrome *c* (100 μM), after which we added buffer, fMLF (10<sup>-7</sup> M), serum-opsonized zymosan (SOZ); Zymosan, (Sigma-Aldrich, USA) 1.0 mg/ml, opsonized with 10% v/v pooled serum for 10 minutes at 37°C), or PMA (100 ng/ml). The supernatant was analyzed spectrophotometrically to determine the O<sub>2</sub><sup>-</sup>-dependent reduction of ferri-cytochrome *c* at 549.5 nm. Superoxide dismutase was added to a reaction tube prepared in an identical manner, to serve as a blank.

### **Intracellular oxidase activity: luminol-enhanced chemiluminescence**

Neutrophils were assessed for intracellular ROS production by evaluating chemiluminescence. Neutrophils (100,000 cells/well) in 200  $\mu$ l of Hank's Balanced Salt Solution (HBSS) with divalent cations and 10 mM HEPES medium were incubated with 100  $\mu$ M luminol at 37°C for 10 minutes. Soluble and particulate ligands, buffer, PMA (100 ng/ml), SOZ (0.1 mg/ml), and heat-killed *E. coli* (100:1 neutrophil) were added to the wells. Light production was monitored every 2 min for 120 min on a Promega Glomax (Promega Corp., USA) luminescence plate reader.

### **Overall oxidase activity: oxygen consumption**

Oxygen concentration was measured with a Clark electrode at 37°C, with stirring, as previously described (6). Neutrophils ( $2.5 \times 10^6$ /ml) were stimulated with SOZ (1 mg/ml), *E. coli* (OD<sub>600</sub>= 0.1 in the presence of 2 mM azide) or PMA 100 ng/ml.

### **Expression of *NCF4* mutations in transfected HEK293T cells**

Direct mutagenesis was performed to obtain the different *NCF4* mutations in the PCMV6-*NCF4*-WT-DDK plasmid from Origene. Cells were transfected with 2  $\mu$ g of plasmid in the presence of Lipofectamine (Invitrogen) for 24 hours. The overproduced p40<sup>phox</sup> protein was detected in total extracts by western blotting with a polyclonal anti-p40<sup>phox</sup> antibody from Merck Millipore and an anti-DDK antibody from Origene.

### **Generation of EBV-B cells and retrovirus-mediated transduction with *NCF4* alleles in EBV-B cells**

EBV-B cells were cultured in RPMI medium supplemented with 10% (v/v) FCS (referred to here as complete medium). The presence of p40<sup>phox</sup> was analyzed by western blotting. Monoclonal anti-gp91<sup>phox</sup>, anti-p22<sup>phox</sup> and anti-GAPDH (loading control) antibodies were obtained from Santa Cruz. Polyclonal anti-p47<sup>phox</sup>, anti-p22<sup>phox</sup> and anti-p40<sup>phox</sup> antibodies were obtained from Merck Millipore. Retrovirus-mediated transduction was performed as previously described (7). Briefly, the coding sequences of the WT and mutant *NCF4* alleles were inserted into the pLZRS-IRES-ΔNGFR plasmid. The new plasmids generated were used to transfect Phoenix cells for virus production. EBV-B cells from p40<sup>phox</sup>-deficient patients were infected with the viral concentrate. Stable retrovirus-mediated transduction was confirmed in cells expressing CD271, which were then used for functional assays.

#### **Viral transduction of NB4 KO cell lines.**

The coding sequence of p40<sup>phox</sup> (NM\_000631) without a stop codon was ordered from Invitrogen, with a 5' flanking sequence of GAATTCCGCCACC and a 3' flanking sequence of GGGTCGAC. Several mutations not affecting protein coding were also introduced into the target sequence of the CRISP oligomers. The R105Q mutant was created with the QuikChange Site-Directed Mutagenesis Kit (Agilent Technologies, USA). The p40<sup>phox</sup> sequence was inserted into pmCherry-N1. The p40<sup>phox</sup>-mCherry fragment from this construct was digested with *EcoRI* and *NotI* and inserted into pENTR1A. The resulting pENTR1A - p40<sup>phox</sup>-mCherry construct was recombined, in the presence of LR Clonase II (Thermo Fisher Scientific, USA) with pRRL PPT SFFV GFP prester SIN, in which the GFP was replaced with a Gateway Cassette. The resulting plasmid, pSIN – p40<sup>phox</sup>-mCherry, was used to reconstitute the knockout cell line. NB4 p40<sup>phox</sup> KO cells were reconstituted by lentiviral transduction. Lentiviral particles were generated by the transient cotransfection of HEK293T cells with pSIN – p40<sup>phox</sup>-mCherry, pMDLgp, pRSV-rev and

pCMV-VSVg, with TransIT-LT1. The day after transfection, the cells were plated on NB4 medium. The virus-containing supernatant was harvested on days 2 and 3 after transfection and filtered through 0.45- $\mu\text{m}$  pores; we then used 1 ml of the filtrate with  $5 \times 10^5$  NB4 p40<sup>phox</sup> KO cells on two successive days. Cells positive for mCherry were selected by FACS sorting. For differentiation, NB4 cells were grown at a density of  $5 \times 10^5$  cells/ml, and all-*trans* retinoic acid (ATRA) was added to a final concentration of 5  $\mu\text{M}$ . One volume of medium was added to the cells between three and five days after the addition of ATRA.

### **Neutrophil extracellular trap (NET) formation**

We incubated 250,000 neutrophils on coverslips (12 mm, Menzel GmbH & Co KG, Braunschweig, Germany) in a sterile 24-well plate (Nuclon Delta Surface, Thermo Fisher) at 37°C, under an atmosphere containing 5% CO<sub>2</sub>, for 10 minutes, after which PMA (100 ng/ml) was added. The cells were then incubated for 3 hours at 37°C (5 hours for NB4 cells), under an atmosphere containing 5% CO<sub>2</sub>. Cells were fixed by incubation with 3.7% (w/v) paraformaldehyde (PFA) in PBS. After overnight storage at 4°C, the cells were incubated with mouse anti-myeloperoxidase (MPO) (Abcam, Cambridge, UK) and rabbit anti-human elastase (HNE) (Sanquin) antibodies diluted 1:500 in PBS/5% (v/v) BSA, for 30 minutes at room temperature. The NET components MPO, HNE and DNA were stained red, green and blue, respectively, with anti-mouse secondary antibodies (goat anti-mouse-IgG 680 RD, 926-68070, Li-Cor, Bad Homburg, Germany), anti-rabbit secondary antibodies (goat anti-rabbit-IgG 488, Life Technologies) 1:500, and Hoechst stain (Sigma-Aldrich; 1:40,000). NET formation was quantified by confocal microscopy (TCS SP8, Leica, Wetzlar, Germany) as previously described (8). We observed at least four fields of 2,922 x 2,922  $\mu\text{m}$  with a 40x objective lens. The same contrast was used for all images. Images from individual color channels (red for MPO, green for NE and blue for DNA) were exported to ImageJ

(NIH, Bethesda, MD, USA). Contrast was adjusted to minimize background autofluorescence, and the same fluorescence threshold was applied to all samples within the same experiment. The MPO- and HNE-stained areas were measured as the percentage of the image area covered by positive fluorescence staining per field, with ImageJ (NIH).

### **Exon trapping**

PCR of genomic DNA flanking position c.759-1, including the entire exon 8a, intron 8a and exon 8c, was performed with gDNA from a healthy control. The PCR product was inserted into pSPLP3 for exon trapping. Targeting mutagenesis was performed to generate the c.759-1G>C mutation. COS 7 cells were transfected over a 24 h period with 500 ng of plasmid containing the WT or mutated sequence. RNA was obtained from the transfected cells and subjected to reverse transcription to generate cDNA. PCR was performed on the cDNA, with primers SD6 and SA2, which bind the sequencing flanking the artificial exon in pSPLP3, and the amplification of the spliced products was evaluated by sequencing one hundred colonies by TOPOTA amplification.

### **Supplementary references**

1. Roos D, Loos JA. Changes in the carbohydrate metabolism of mitogenically stimulated human peripheral lymphocytes. I. Stimulation by phytohaemagglutinin. *Biochim Biophys Acta*. 1970;222(3):565-582.
2. Kuijpers TW, et al. Combined immunodeficiency with severe inflammation and allergy caused by ARPC1B deficiency. *J Allergy Clin Immunol*. 2017 ;140(1):273-277.
3. Decleva E, Menegazzi R, Busetto S, Patriarca P, Dri P. Common methodology is inadequate for studies on the microbicidal activity of neutrophils. *J Leukoc Biol*. 2006;79(1):87-94.
4. Drewniak A, et al. Invasive fungal infection and impaired neutrophil killing in human CARD9 deficiency. *Blood*. 2013;121(13):2385-2392.
5. Gazendam RP, et al. Impaired killing of *Candida albicans* by granulocytes mobilized for transfusion purposes: a role for granule components. *Haematologica*. 2016;101(5):587-596.
6. Weening RS, Roos D, and Loos JA. Oxygen consumption of phagocytizing cells in human leukocyte and granulocyte preparations: a comparative study. *J Lab Clin Med*. 1974;83(4):570-7.

7. Martinez-Barricarte R, et al. Transduction of Herpesvirus saimiri-transformed T cells with exogenous genes of interest. *Curr Protocol Immunol.* 2016;115(7.21c.1-7.c.12).

8. McDonald B, Urrutia R, Yipp BG, Jenne CN, and Kubes P. Intravascular neutrophil extracellular traps capture bacteria from the bloodstream during sepsis. *Cell Host Microbe.* 2012;12(3):324-33.
